# Supplementary material for: Role of the water balance constraint in the long short-term memory network: large-sample tests of rainfall-runoff prediction
Source: Copernicus journal article supplement (doi:10.5194/egusphere-2023-2841), 2024-01-05
Supplement: Supplementary file [file egusphere-2023-2841-AC2-supplement.pdf]

## Response

*Anonymous Referee #2:*

### *General Comments*

*The authors derive a clear objective, investigating the robustness of LSTM and MC\_LSTM against data sparsity, stability against parameter initialization, and test the transferability under different climatic conditions. The paper is in my opinion highly relevant given the current developments in using KI in Hydrology, it is generally well structured, easy to read and understandable and compact without missing relevant information. I believe therefore the manuscript is well suited for publication in the HESS journal.*

Thank you very much. We appreciate the positive comments.

*Some comments/suggestion that I believe would improve the manuscript and that should be addressed before final publication is the following:*

Thank you very much for the constructive suggestions and we have improved the paper accordingly. Below please find the point-to-point responses.

- *It is clearly stated and shown in the last publications of the Kratzert/Nearing group that the full potential of LSTM application can be achieved when training the LSTM on a large number of variable catchments including also static and dynamic catchment features (see also most recent contribution: <https://eartharxiv.org/repository/view/6363/>). I would at least like to see a discussion of this topic and how this is related to the presented work.*

Thank you very much for the insightful comment. Following the recommend literature, we have rewritten the Discussion section to clarify the differences and connections between this paper with the mentioned literature above. The related part are as follows:

“Although TGDS models can provide more accurate and robust predictions than pure DL models in basin-wise scale or data scarce conditions, it deserves additional scrutiny when trained with data from a large number of diverse basins (Frame et al., 2022; Nearing et al., 2021; Wi and Steinschneider, 2022). Recent studies have illustrated that the LSTM network works better for rainfall-runoff prediction when trained with a large amount of hydrologically diverse data than with data from a single watershed (Kratzert et al., 2024). Specifically, for DL models, physical constraints are effective in local models but offer little improvement in the regional models (Frame et al., 2023; Xie et al., 2021), even reduce predictive performance under extreme events (Frame et al., 2022). This outcome can be attributed to that pure DL models might be flexible enough to capture the behaviour in observation data with inconsistent water balance closure better than DL models constrained by the strict water balance (Kratzert et al., 2024; Frame et al., 2023; Beven, 2020). Besides, catchments with similar flood generating processes and similar characteristics may have some similar outliers and DL models can capture the rainfall-runoff responses among these basins (Xie et al., 2021; Bertola et al., 2023; Wi and Steinschneider, 2024). Therefore, there seems to be a compensating effect between data and knowledge on DL models, where the process knowledge is crucial for models trained with sparse data but less important with sufficient data. Large-sample hydrology is thus expected to enhance the performances of DL models for extreme events predictions and climate change projections (Bertola et al., 2023; Wi and Steinschneider, 2022, 2024).

Given that data is not always sufficient, the sensitivity of DL models when given scarce training data is essentially important (Feng et al., 2021; Gauch et al., 2021b). The TGDS provides effective tools for reducing data requirements of DL models (Karniadakis et al., 2021; Karpatne et al., 2017; Read et al., 2019; Xie et al., 2021). Therefore, this paper explores the effects of the water balance constraint on the robustness of the LSTM under restricted conditions, thereby training single model for each single basin rather than simultaneously for a large number of basins. Although the latter can achieve better performance (Kratzert et al., 2024), it is beyond the scope of

this paper but worthy of further study....” (Page 19, Lines 378 to 397)

- *Given for example the results of Figure 2, they can be interpreted as LSTM’s being “better” than the EXP-Hydro model. However, as actually mentioned by Beven (2020, doi10.1002/hyp.13805), it is still ~50% of the catchments show KGE-values of below 0.6, in my opinion indicating strong problems in the modelling outside the model-structure and calibration procedure.*

Thank you very much for the constructive comment. The catchments with KGE values below 0.6 are mainly located in the central arid regions of the United States. In these areas, the runoff generation is dominated by the infiltration-excess overland flow, which is largely controlled by short-duration, high-intensity precipitation events (Berghuijs et al., 2016). The EXP-HYDRO model operates with a mechanism of saturation-excess overland flow and is mainly applicable in the central arid regions (Jiang et al., 2020). Due to the infrequent storms and flood records in such regions, it is difficult for the LSTM network to satisfactorily reproduce flashy hydrographs (Jiang et al., 2020). Such a spatial pattern of model performance was also revealed in previous studies (Kratzert et al., 2018; Newman et al., 2017; Jiang et al., 2020). To dig into the applicable model in such regions is beyond the scope of this paper but worthy of further study. In order to show the competitive performances of the LSTM, MC-LSTM and EXP-HYDRO models in this paper compared to previous studies, we have added a comparison table about the model performance:

“Table 2 compares the Nash-Sutcliffe efficiency (NSE) of the three models in this paper with those in previous studies (Jiang et al., 2020; Kratzert et al., 2018; Patil and Stieglitz, 2014; Newman et al., 2017; Hoedt et al., 2021), most of which are based on the same dataset and the roughly overlapping testing period as those in this paper. Among these models, the LSTM, MC-LSTM and EXP-HYDRO models in this paper exhibit competitive performances, suggesting the reasonability of the hyperparameter optimization and calibration procedures.” (Page 11, Lines 247 to 252)

**Table 2.** Comparison of daily NSE statistics across the CAMELS catchments.

| Model      | Single model for | Count of basins | Dataset | Daily NSE statistics |       |                                | Source                     |
|------------|------------------|-----------------|---------|----------------------|-------|--------------------------------|----------------------------|
|            |                  |                 |         | median               | mean  | Proportion for NSE $\geq 0.55$ |                            |
| LSTM       | Single basin     | 531             | CAMELS  | 0.67                 | 0.63  | 76%                            | This paper                 |
| MC-LSTM    | Single basin     | 531             | CAMELS  | 0.63                 | 0.59  | 71%                            | This paper                 |
| EXP-HYDRO* | Single basin     | 531             | CAMELS  | 0.49                 | 0.42  | 40%                            | This paper                 |
| LSTM       | Single basin     | 569             | CAMELS  | 0.60                 | 0.52  | 61.5%                          | Jiang et al. (2020)        |
| EXP-HYDRO* | Single basin     | 569             | CAMELS  | 0.48                 | -0.16 | 38.3%                          | Jiang et al. (2020)        |
| LSTM       | Single basin     | 241             | CAMELS  | 0.65                 | 0.63  | NA                             | Kratzert et al. (2018)     |
| EXP-HYDRO  | Single basin     | 756             | HCDN    | NA                   | NA    | ~43% (>0.6)                    | Patil and Stieglitz (2014) |
| VIC        | Single basin     | 531             | CAMELS  | 0.57-0.59            | NA    | ~56%                           | Newman et al. (2017)       |
| LSTM       | Multiple basins  | 447             | CAMELS  | 0.737                | NA    | NA                             | Hoedt et al. (2021)        |
| MC-LSTM    | Multiple basins  | 447             | CAMELS  | 0.726                | NA    | NA                             | Hoedt et al. (2021)        |

*HCDN: Hydro-Climate Data Network; VIC: Variable Infiltration Capacity model*

*EXP-HYDRO\*: Deep learning wrapped EXP-HYDRO model; NA: not available*

Additionally, as mentioned by the literature (Beven, 2020), the observation data with inconsistent water balance closure may be one of the reasons for that physical constraints offer little improvement in the regional models and even reduce predictive performance under extreme events, thus we have added this reason in the Discussion section:

“This outcome can be attributed to that pure DL models might be flexible enough to capture the behaviour in observation data with inconsistent water balance closure better than DL models constrained by the strict water balance (Kratzert et al., 2024; Frame et al., 2023; Beven, 2020)” (Page 19, Lines 384 to 386)

- *I believe the statement in L374-375 is not supported by the experimental design of the paper – no LSTM model is trained simultaneously to many catchments here, so the statement needs to be modified – or I have misread section 2/3*

Thank you very much for the careful comment. We are sorry for the confusing information and have removed this sentence.

### *Specific/technical Comments*

*The following minor comments/suggestions I would like to make:*

- *L51: “On” instead of “One”*

Thanks a lot for your careful comment. We have corrected this mistake.

- *L53: Mass Balance has already been introduced by Frame et al. 2023*

Thank you for the insightful comment. We have added this citation:

“On the one hand, without explicit physical mechanism such as the conservation of mass and energy, the LSTM network cannot guarantee causal relationships as physical models can (Wang et al., 2023; Xie et al., 2021; Frame et al., 2023), which may lead to spurious and inaccurate prediction that is potential to violate water balance, particularly when extrapolating beyond the range of training data (Bhasme et al., 2022; Reichstein et al., 2019).” (Page 2, Lines 45 to 49)

- *L66: please define robustness as used here – in statistics it has a very specific meaning related to performance when a priori assumption (e.g. Normality) are violated*

Thank you for the constructive comment. The definition of the robustness used in this paper has been added:

“Therefore, there is yet no consensus on the effects of the water balance constraint on the use of the LSTM network for rainfall-runoff prediction (Pokharel et al., 2023), particularly its robustness—the ability to perform consistently across varying conditions (Manure et al., 2023). Aiming to bridge the gap, this paper focuses on how the water balance constraint in model architecture affects the robustness of the basin-wise trained LSTM network for rainfall-runoff prediction. Focusing on the robustness

of the LSTM and MC-LSTM, the objectives are to examine (1) the sensitivity to data sparsity, (2) the stability against random parameters initialization and (3) the transferability under contrasting climate conditions...” (Page 3, Lines 60 to 66)

- *L80: a small figure as e.g. in Kratzert et al. 2018 to visualize the LSTM would not be bad, the equations are not intuitive, it would also help in L98f to understand the implementation of the MC*

Thanks for your suggestion. To help understand the implementation of mass balance, two figures of the internal operations of a standard LSTM network and a MC-LSTM network have been added in the Supplement as Fig. S1 and Fig. S2, respectively.

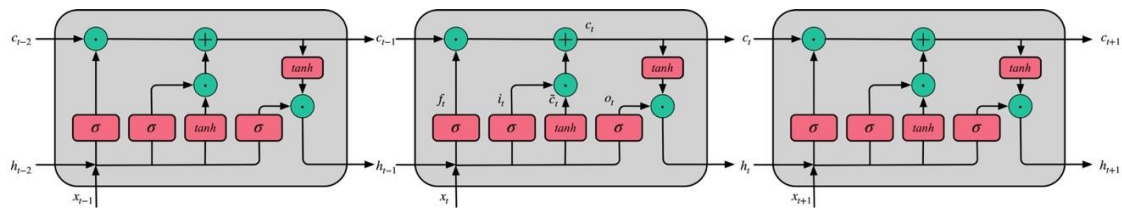

Figure S1. The internal operation of a standard LSTM network.

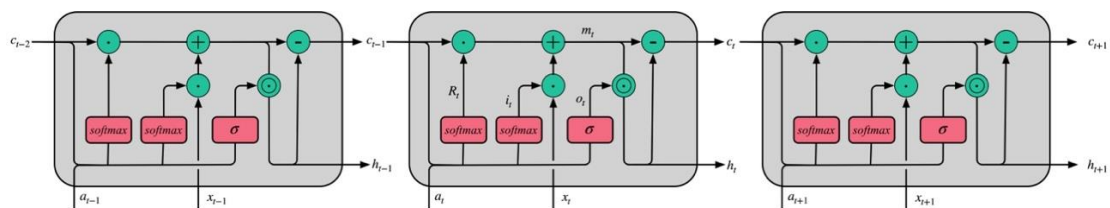

Figure S2. The internal operation of a MC-LSTM network.

- *L120: Equation 11 does not explain how M, ET Q Ps and Pr are calculated – can also go into an appendix*

Thank you. The explanation of how to calculate the 5 flux variables of the EXP-HYDRO model has been added in the Supplement as Text S1:

“The EXP-HYDRO model is a conceptual, spatially lumped rainfall-runoff model developed by Patil and Stieglitz (2014). The physical equations and parameters are well introduced and organized in Text S1 in the Supporting Information of Jiang et al. (2020). For easy reading, the calculation equations of the 5 flux variables ( $M$ ,  $ET$ ,  $Q$ ,  $P_s$  and  $P_r$ ) are briefly introduced here.

$P_s$  and  $P_r$  are respectively the daily snowfall (mm/day) and rainfall (mm/day), which are estimated by the daily precipitation ( $P$ , mm/day) and daily temperature ( $T$ , °C) as follows:

$$P_s = fun1(P, T, T_{min}) = \begin{cases} 0, & T > T_{min} \\ P, & T \leq T_{min} \end{cases} \quad (S1)$$

$$P_r = fun2(P, T, T_{min}) = \begin{cases} P, & T > T_{min} \\ 0, & T \leq T_{min} \end{cases} \quad (S2)$$

Where  $T_{min}$  is a parameter representing the temperature threshold where the precipitation falls as snow.

The snowmelt ( $M$ , mm/day) is simulated by a simple thermal degree-day model related to  $T$  and the snow accumulation bucket ( $S_0$ ) based on the following equation:

$$M = fun3(S_0, T, D_f, T_{max}) = \begin{cases} 0 & T < T_{max} \\ \min\{S_0, D_f \cdot (T - T_{max})\}, & T > T_{max} \text{ and } S_0 > 0 \\ \text{otherwise} & \end{cases}$$

Where  $D_f$  is a parameter denoting the thermal degree-day factor (mm/day/°C);  $T_{max}$  is another parameter representing the temperature threshold where the accumulated snow begins to melt.

The evapotranspiration is denoted by  $ET$  (mm/day), which is calculated as the fraction of the potential evapotranspiration ( $PET$ , mm/day, estimated by Hamon’s formulation as Eq. S5) as follows:

$$ET = fun4(S_1, PET, S_{max}) = \begin{cases} 0, & S_1 < 0 \\ PET \cdot \left(\frac{S_1}{S_{max}}\right), & 0 \leq S_1 \leq S_{max} \\ PET, & S_1 > S_{max} \end{cases} \quad (S4)$$

$$PET = 29.8 \cdot L_{day} \cdot \frac{e^*(t)}{T + 273.2} \quad (S5)$$

$$e^*(t) = 0.611 \cdot e^{17.3 \cdot T / (T + 237.3)} \quad (S6)$$

Where catchment bucket ( $S_1$ ) denotes its current storage;  $S_{max}$  is a parameter representing the storage capacity of the catchment bucket;  $L_{day}$  is the day length (hour).

The streamflow ( $Q$ ) is estimated as the sum of the baseflow ( $Q_b$ ) and the capacity-excess runoff ( $Q_s$ ), which are respectively expressed as follows:

$$Q_b = fun5(S_1, f, S_{max}, Q_{max}) = \begin{cases} 0, & S_1 < 0 \\ Q_{max} \cdot e^{-f \cdot (S_{max} - S_1)}, & 0 \leq S_1 \leq S_{max} \\ Q_{max}, & S_1 > S_{max} \end{cases} \quad (S7)$$

$$Q_s = fun6(S_1, S_{max}) = \begin{cases} 0, & S_1 \leq S_{max} \\ S_1 - S_{max}, & S_1 > S_{max} \end{cases} \quad (S8)$$

$$Q = Q_b + Q_s \quad (S9)$$

Where  $f$  and  $Q_{max}$  are two parameters representing the decline rate of runoff (mm<sup>-1</sup>) and the maximum subsurface runoff (mm/day), respectively.”

- *L125: 1-2 sentences on how EXP-Hydro is wrapped into a DL architecture would be interesting*

Thank you very much for the constructive suggestion. We have added more details of the DL-wrapped EXP-HYDRO model and revised the original information for easy understanding:

“That is, the EXP-HYDRO model is rewritten using a differentiable PyTorch framework (Paszke et al., 2019), the typical recurrent neural network architecture, where the mathematical expressions and learnable parameters is replaced with the physical equations and parameters of the EXP-HYDRO model (Zhong et al., 2023; Jiang et al., 2020).” (Page 5, Lines 120 to 124)

- *L209: I do not think “maximumly” can be used – using to a maximum!?*



Thanks a lot for your careful comment. We have corrected this mistake.

- *L423: there are no further co-authors!*

Thanks a lot for your careful comment. We have corrected this mistake.

I feel, the manuscript has in general the potential to be a valuable contribution to HESS, however, questions and issues raised in the general comments would need to be addressed and discussed to a significant part before final acceptance.

We greatly appreciate your positive comments and constructive suggestions.

## References

- Berghuijs, W. R., Woods, R. A., Hutton, C. J., and Sivapalan, M.: Dominant flood generating mechanisms across the United States, *Geophys. Res. Lett.*, 43, 4382–4390, <https://doi.org/10.1002/2016GL068070>, 2016.
- Hoedt, P.-J., Kratzert, F., Klotz, D., Halmich, C., Holzleitner, M., Nearing, G. S., Hochreiter, S., and Klambauer, G.: MC-LSTM: mass-conserving LSTM, in: *Proceedings of the 38th International Conference on Machine Learning, International Conference on Machine Learning*, 4275–4286, 2021.
- Jiang, S., Zheng, Y., and Solomatine, D.: Improving AI system awareness of geoscience knowledge: symbiotic integration of physical approaches and deep learning, *Geophys. Res. Lett.*, 47, e2020GL088229, <https://doi.org/10.1029/2020GL088229>, 2020.
- Kratzert, F., Klotz, D., Brenner, C., Schulz, K., and Herrnegger, M.: Rainfall-runoff modelling using long short-term memory (LSTM) networks, *Hydrol. Earth Syst. Sci.*, 22, 6005–6022, <https://doi.org/10.5194/hess-22-6005-2018>, 2018.
- Newman, A. J., Mizukami, N., Clark, M. P., Wood, A. W., Nijssen, B., and Nearing, G.: Benchmarking of a Physically Based Hydrologic Model, *Journal of Hydrometeorology*, 18, 2215–2225, <https://doi.org/10.1175/JHM-D-16-0284.1>, 2017.
- Patil, S. and Stieglitz, M.: Modelling daily streamflow at ungauged catchments: what

information is necessary?, *Hydrol. Process.*, 28, 1159–1169,  
<https://doi.org/10.1002/hyp.9660>, 2014.
